# Supplementary material for: Fabrication of Nanofibers Based on Hydroxypropyl Starch/Polyurethane Loaded with the Biosynthesized Silver Nanoparticles for the Treatment of Pathogenic Microbes in Wounds
Source: MDPI journal article supplement (doi:10.3390/polym14020318), 2022-01-13
Supplement: s1 [file s1]

## Supplementary data

### Fabrication of nanofibers based on hydroxypropyl starch/polyurethane loaded with the biosynthesized silver nanoparticles for the treatment of pathogenic microbes in wounds

Mohamed E. El-Hefnawy<sup>1\*</sup>, Sultan Alhayyani<sup>1</sup>, Mohsen M. El-Sherbiny<sup>2</sup>, Mohamed I. Sakran<sup>3,5</sup> and Mohamed H. El-Newehy<sup>4,5\*</sup>

<sup>1</sup> Department of Chemistry, Rabigh College of Sciences and Arts, King Abdulaziz University, Jeddah 21589, Saudi Arabia

<sup>2</sup> Marine Biology Department, Faculty of Marine Sciences, King Abdulaziz University, Jeddah 21589, Saudi Arabia

<sup>3</sup> Biochemistry Department, Faculty of Science, University of Tabuk, Tabuk, Saudi Arabia

<sup>4</sup> Department of Chemistry, College of Science, King Saud University, Riyadh 11451, Saudi Arabia.

<sup>5</sup> Department of Chemistry, Faculty of Science, Tanta University, Tanta 31527, Egypt.

\* Corresponding author: E-mail: malhefnawy@kau.edu.sa (M.E.E.) and melnewehy@ksu.edu.sa (M.H.E.)

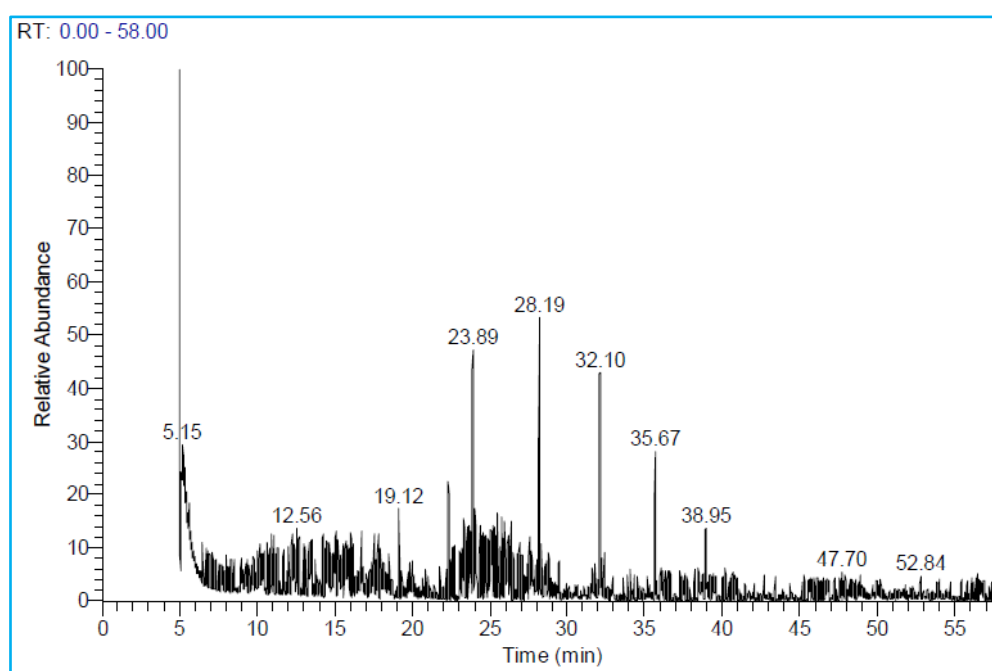

**Figure S1.** GC-MS chromatogram of *Nerium oleander* extract.

**Table S1.** Chemical compositions of *Nerium oleander* extract.

| No.             | R <sub>t</sub> | Area% <sup>a</sup> | M.W. | M.F.                                                          | Identified compounds                                                              | Class/Category                     |
|-----------------|----------------|--------------------|------|---------------------------------------------------------------|-----------------------------------------------------------------------------------|------------------------------------|
| 1               | 5.15           | 12.04              | 266  |                                                               | C <sub>18</sub> H <sub>34</sub> O <sub>5</sub> -Octadecenal                       | Fatty aldehydes                    |
| 2               | 19.12          | 2.15               | 224  |                                                               | C <sub>16</sub> H <sub>32</sub> -Hexadecene                                       | Unbranched alkene                  |
| 3               | 22.34          | 2.71               | 206  | C <sub>13</sub> H <sub>18</sub> O <sub>2</sub>                | 2-Allyl-5-t-butylhydroquinone                                                     | Hydroquinone derivatives           |
| 4               | 23.33          | 1.21               | 692  | C <sub>44</sub> H <sub>44</sub> N <sub>4</sub> O <sub>4</sub> | N,N'-Dicyclohexyl-1,7-dipyrrolidinylperylene-3,4:9,10-tetracarboxylicacidbisimide | Pyrrolidine derivatives            |
| 5               | 23.89          | 5.70               | 490  | C <sub>35</sub> H <sub>70</sub>                               | 17-Pentatriacontene                                                               | Long-chain alkane                  |
| 6               | 24.04          | 1.70               | 242  | C <sub>13</sub> H <sub>22</sub> O <sub>4</sub>                | Oxalic acid, allyl octyl ester                                                    | Diester                            |
| 7               | 25.77          | 1.38               | 760  | C <sub>48</sub> H <sub>56</sub> O <sub>8</sub>                | Methoxychromene precocene tetramer                                                | Chromenes                          |
| 8               | 25.90          | 1.51               | 678  | C <sub>45</sub> H <sub>58</sub> O <sub>5</sub>                | 7,13,19,25-Tetratertbutyl-27,28,29,30-tetrahydroxy-2,3-bishomo-3-oxacalix[4]arene | Tetratertbutyl derivatives         |
| 9               | 27.45          | 1.39               | 688  | C <sub>42</sub> H <sub>56</sub> O <sub>8</sub>                | 2,3-Diacetoxy-6,7,10,11-tetrapentyloxytriphenylene                                | Triphenylenes                      |
| 10              | 28.19          | 5.92               | 200  | C <sub>13</sub> H <sub>28</sub> O                             | 1-Tridecanol                                                                      | Long-chain fatty alcohol           |
| 11              | 28.31          | 1.21               | 618  | C <sub>44</sub> H <sub>90</sub>                               | Tetratetracontane                                                                 | Long-chain alkane                  |
| 12              | 32.10          | 5.0                | 266  | C <sub>19</sub> H <sub>38</sub>                               | (cis)-2-nonadecene                                                                | Unsaturated aliphatic hydrocarbons |
| 13              | 35.67          | 3.15               | 382  | C <sub>26</sub> H <sub>54</sub> O                             | 1-Hexacosanol                                                                     | Long-chain fatty alcohol           |
| 14              | 38.95          | 2.05               | 326  | C <sub>22</sub> H <sub>46</sub> O                             | 1-Docosanol                                                                       | Long-chain fatty alcohol           |
| <b>T% 47.12</b> |                |                    |      |                                                               |                                                                                   |                                    |

**R<sub>t</sub>:** Retention time; **M.W.:** Molecular weight; **M.F.:** Molecular formula.
